# Supplementary material
Source: Springer Nature journal article supplement (https://www.springermedizin.de/resource/supplementary/12865_2009_248_MOESM12_ESM.pdf/9427594)

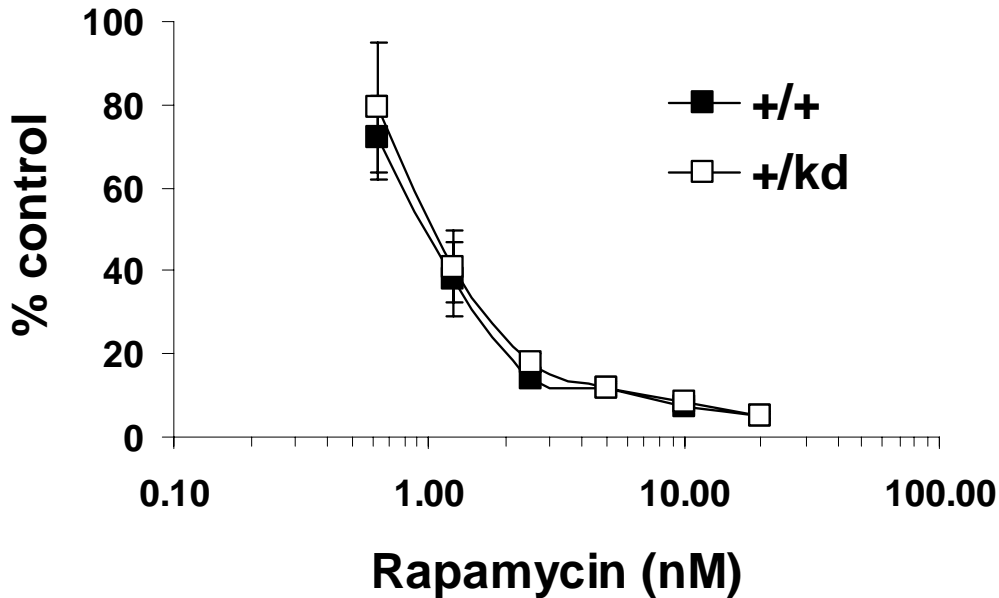

Supplement: MOESM12 [file 9427594]
